# Supplementary material
Source: HighWire-hosted journal article supplement (https://bjgpopen.org/highwire/filestream/5224/field_highwire_adjunct_files/0/Ma_BJGPO.2021.0218_supp.pdf)

## Supplementary Tables and Figures

|           |                                     |
|-----------|-------------------------------------|
| Table S1  | Respondent demographics             |
| Figure S1 | Survey algorithm                    |
| Figure S2 | Survey appearance                   |
| Figure S3 | Survey promotion on Twitter         |
| Figure S4 | Survey promotion on Instagram       |
| Figure S5 | Flowchart of survey respondents     |
| Figure S6 | Word cloud from free text responses |

*Table S1 Respondent demographics*

| <b>Age group</b> | <b>n</b>   | <b>%</b>     | <b>UK Region</b>         | <b>n</b>   | <b>%</b>     |
|------------------|------------|--------------|--------------------------|------------|--------------|
| 16-18            | 70         | 32.7         | South East               | 31         | 14.5         |
| 18-24            | 43         | 20.1         | South West               | 29         | 13.6         |
| 25-34            | 57         | 26.6         | Greater London           | 28         | 13.1         |
| 35-44            | 36         | 16.8         | North West               | 22         | 10.3         |
| 45-54            | 8          | 3.7          | West Midlands            | 21         | 9.8          |
| <b>Total</b>     | <b>214</b> | <b>100.0</b> | East of England          | 14         | 6.5          |
|                  |            |              | Scotland                 | 14         | 6.5          |
|                  |            |              | Yorkshire and the Humber | 14         | 6.5          |
|                  |            |              | East Midlands            | 12         | 5.6          |
|                  |            |              | North East               | 12         | 5.6          |
|                  |            |              | Wales                    | 11         | 5.1          |
|                  |            |              | Northern Ireland         | 6          | 2.8          |
|                  |            |              | <b>Total</b>             | <b>214</b> | <b>100.0</b> |

Figure S1 Survey Algorithm

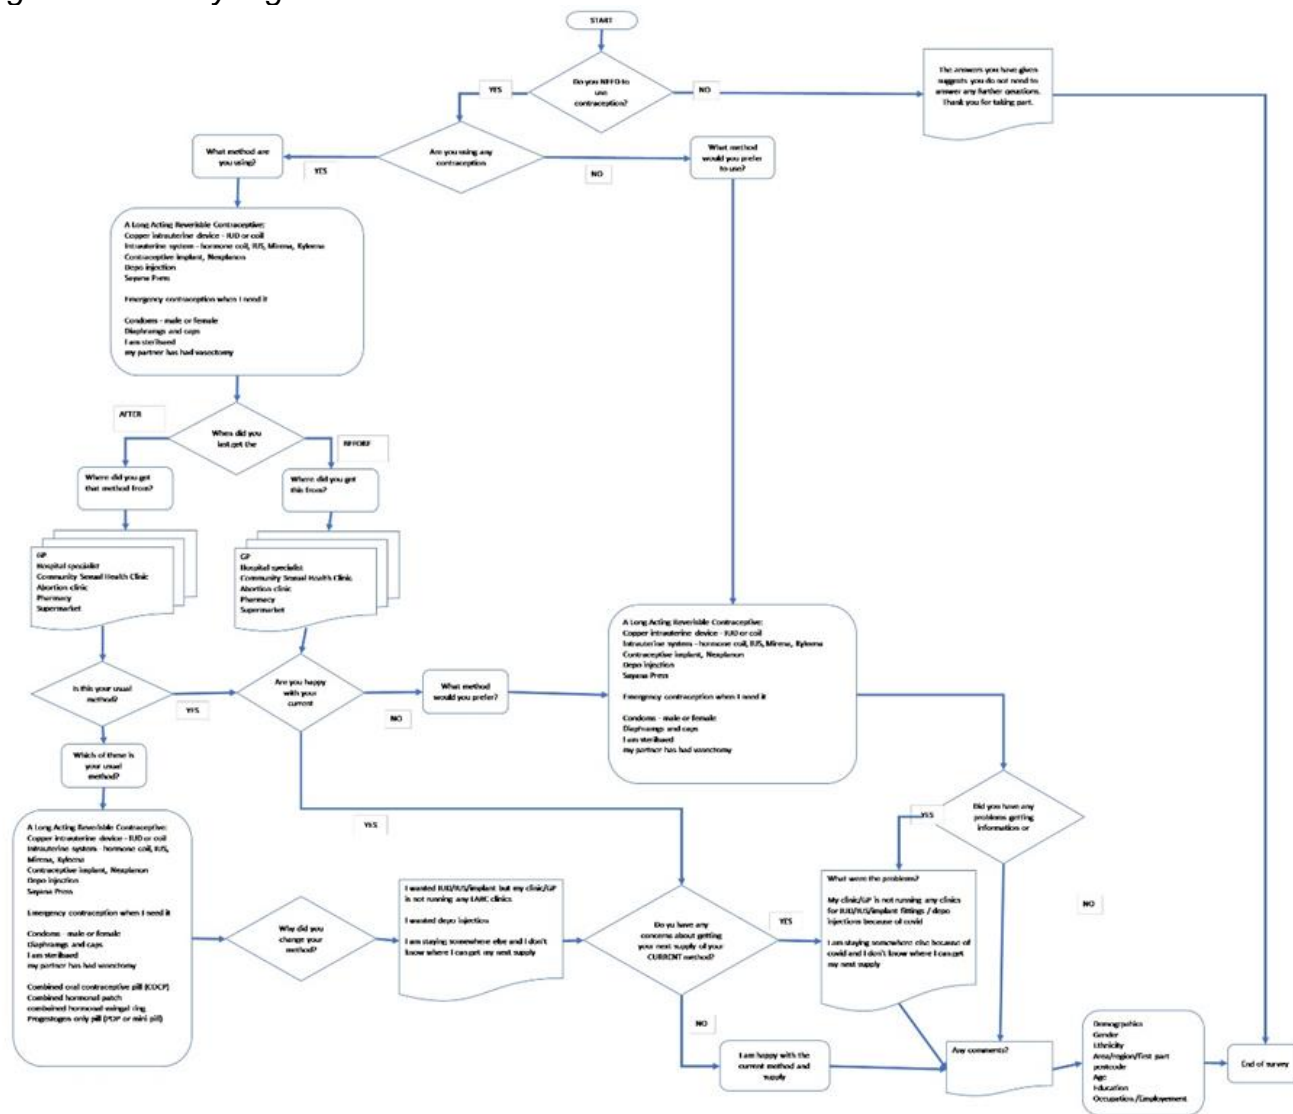

Figure S2 Survey appearance

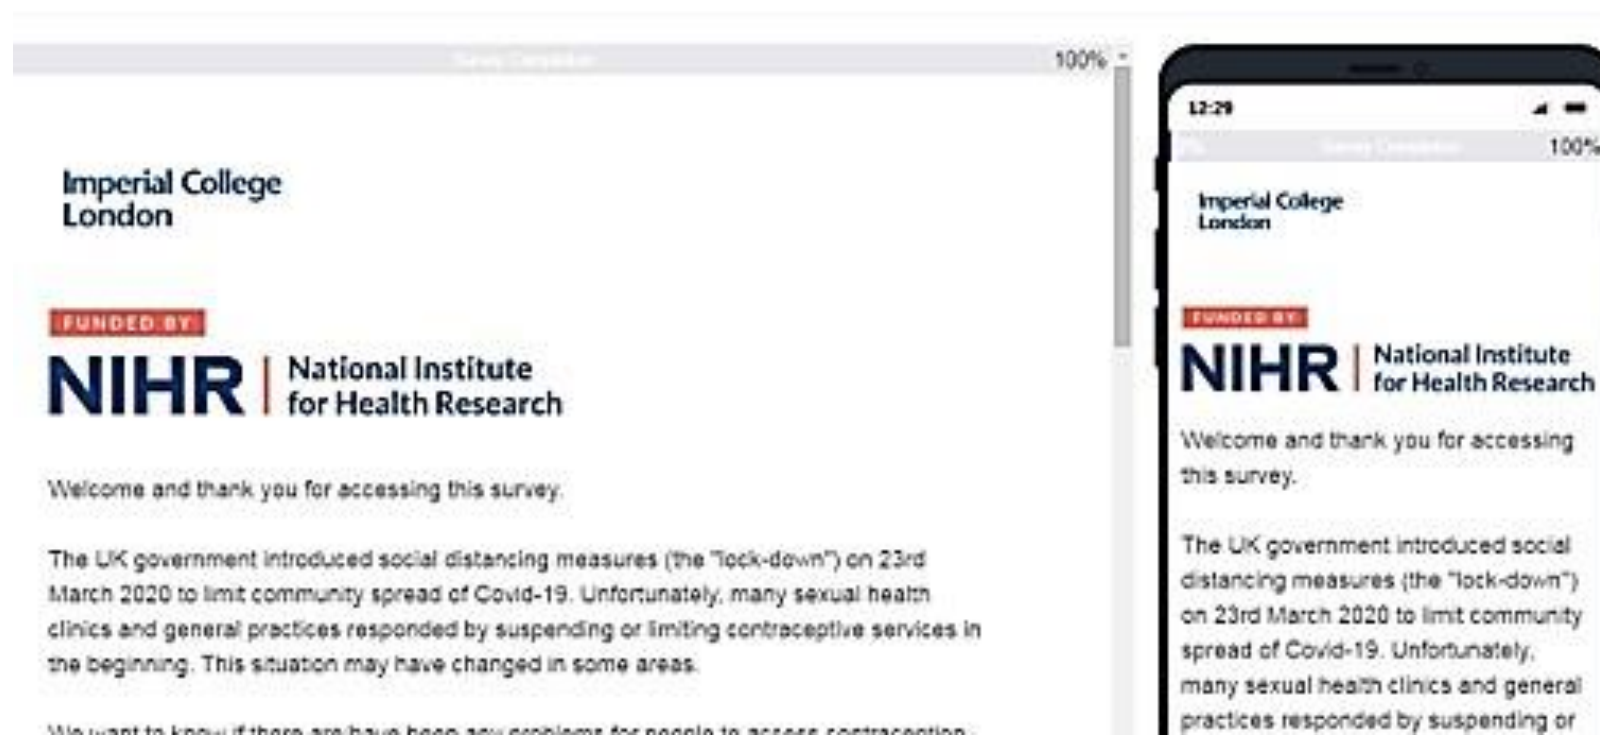

Figure S3 Survey promotion on Twitter

You Retweeted

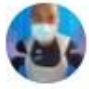

Dr Richard Ma 馬富文 🇪🇺 🇩🇪 🇬🇧 🇫🇷 🇮🇹 🇯🇵 🇬🇧 🇪🇺 #BLM  
@Richard\_GP

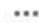

Live in the UK? Need contraception?

In the time it takes for an ad break or for your next bus, join 130+ others from four UK nations to complete our survey on getting contraception during #covid lockdown 🙋

[imperial.eu.qualtrics.com/jfe/form/SV\\_1F...](https://imperial.eu.qualtrics.com/jfe/form/SV_1F...)

Add your voice to improve sexual health!

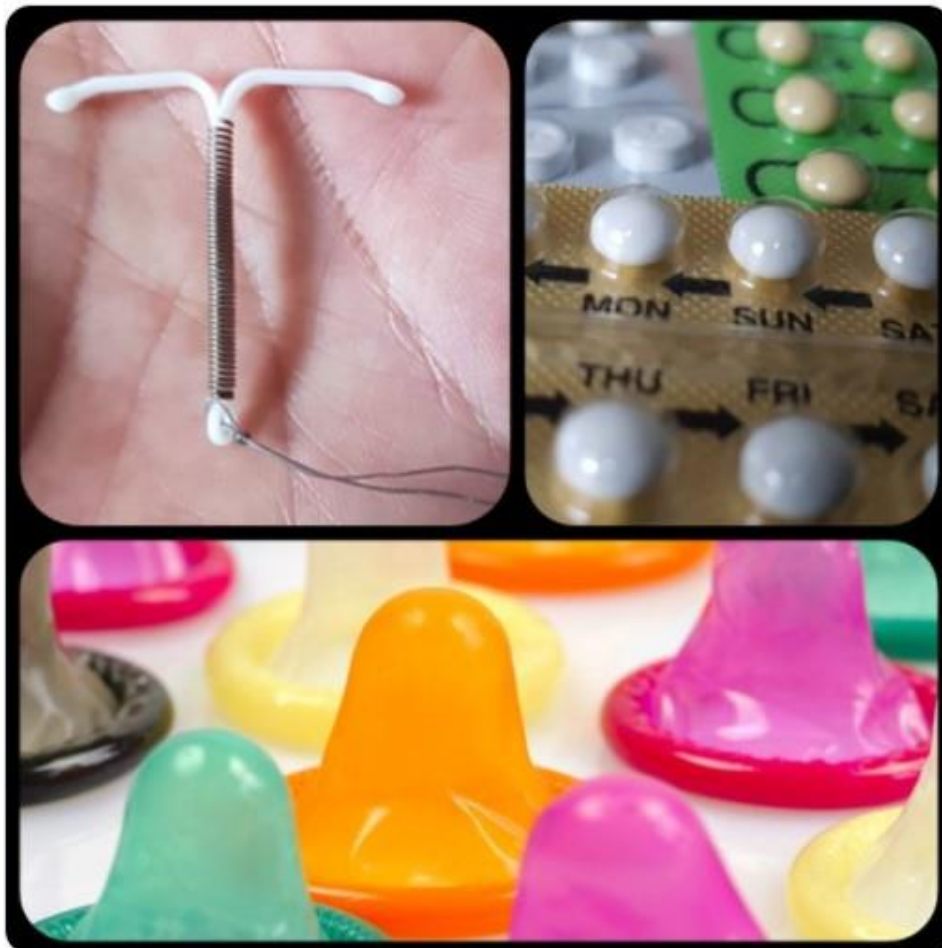

You and Richard Ma 🇪🇺 🇩🇪

9:56 PM · Jun 4, 2020 · Twitter Web App

Figure S4 Survey promotion on Instagram

The screenshot shows an Instagram post from the account 'contraception4u'. The post features three images: a close-up of a white T-shaped IUD on a hand, a blister pack of white and yellow pills with days of the week labeled, and a collection of colorful condoms. The text of the post asks for user experiences with contraception during COVID-19 lockdown and provides information about a survey. The post is dated June 1, 2020, and has 126 likes.

**Instagram** Search

**contraception4u**

**contraception4u** Looking for people who live in the UK and need contraception!

What's the experience of getting contraception during #COVID19 #lockdown?

Was it easy to get the usual method? Are people concerned about their next supply from a GP or clinic?

Tell us more! The answers will help us inform a Cross Party Group on Contraception enquiry and plan ahead for better access during and after full lockdown.

Swipe "learn more" to access the survey 🖱️

#contraception #IUD #thepill

Liked by richard\_ma and 126 others

JUNE 1, 2020

Add a comment... Post

For info and resources about COVID-19, visit the COVID-19 Information Centre.

Figure S5 Flowchart of survey respondents

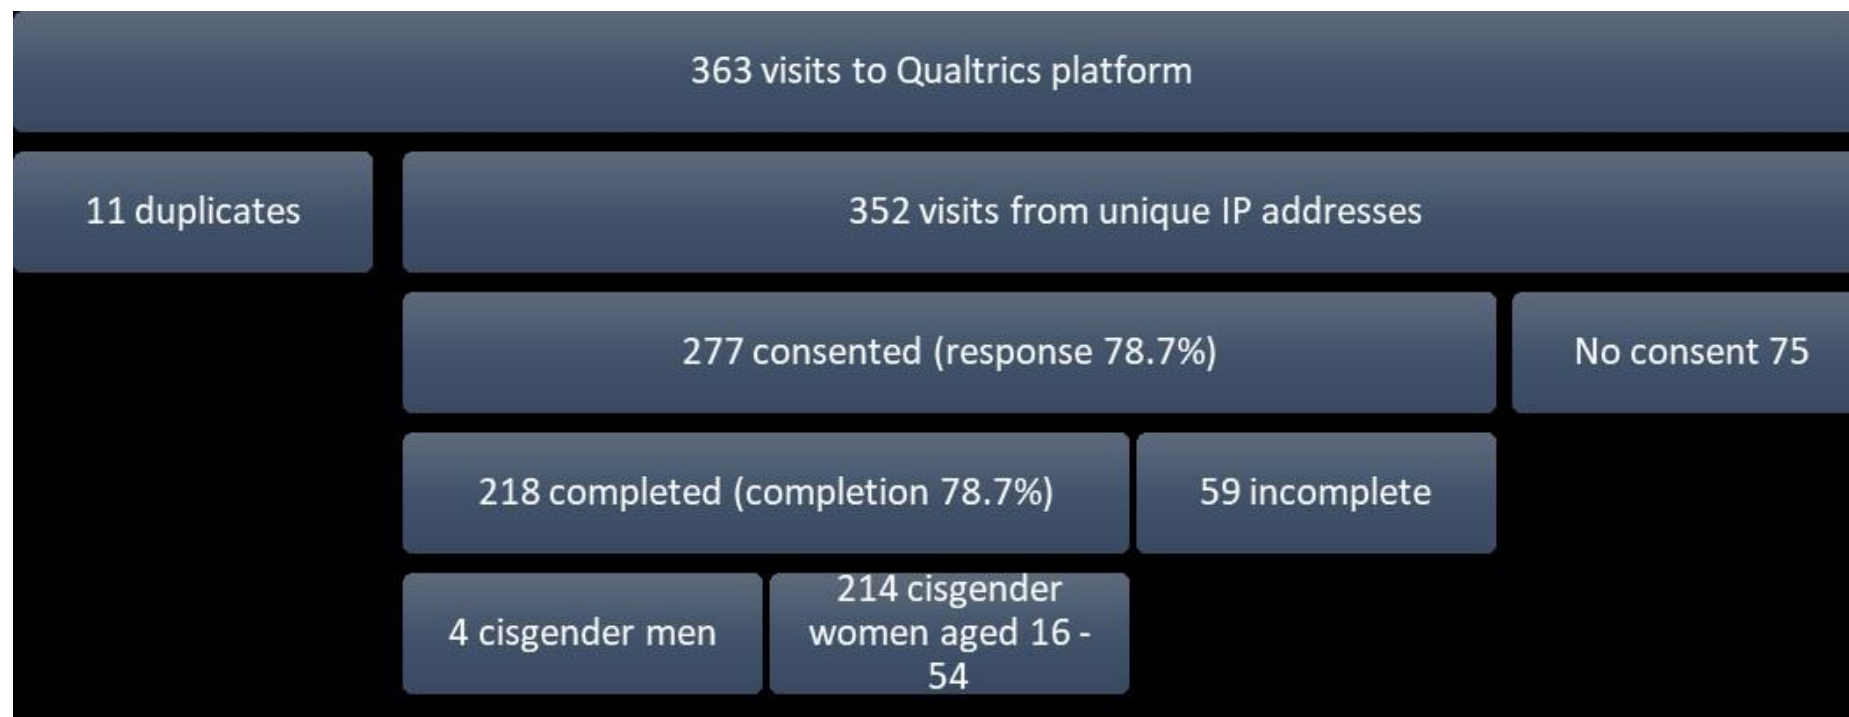



Figure S6 Word cloud of free text responses

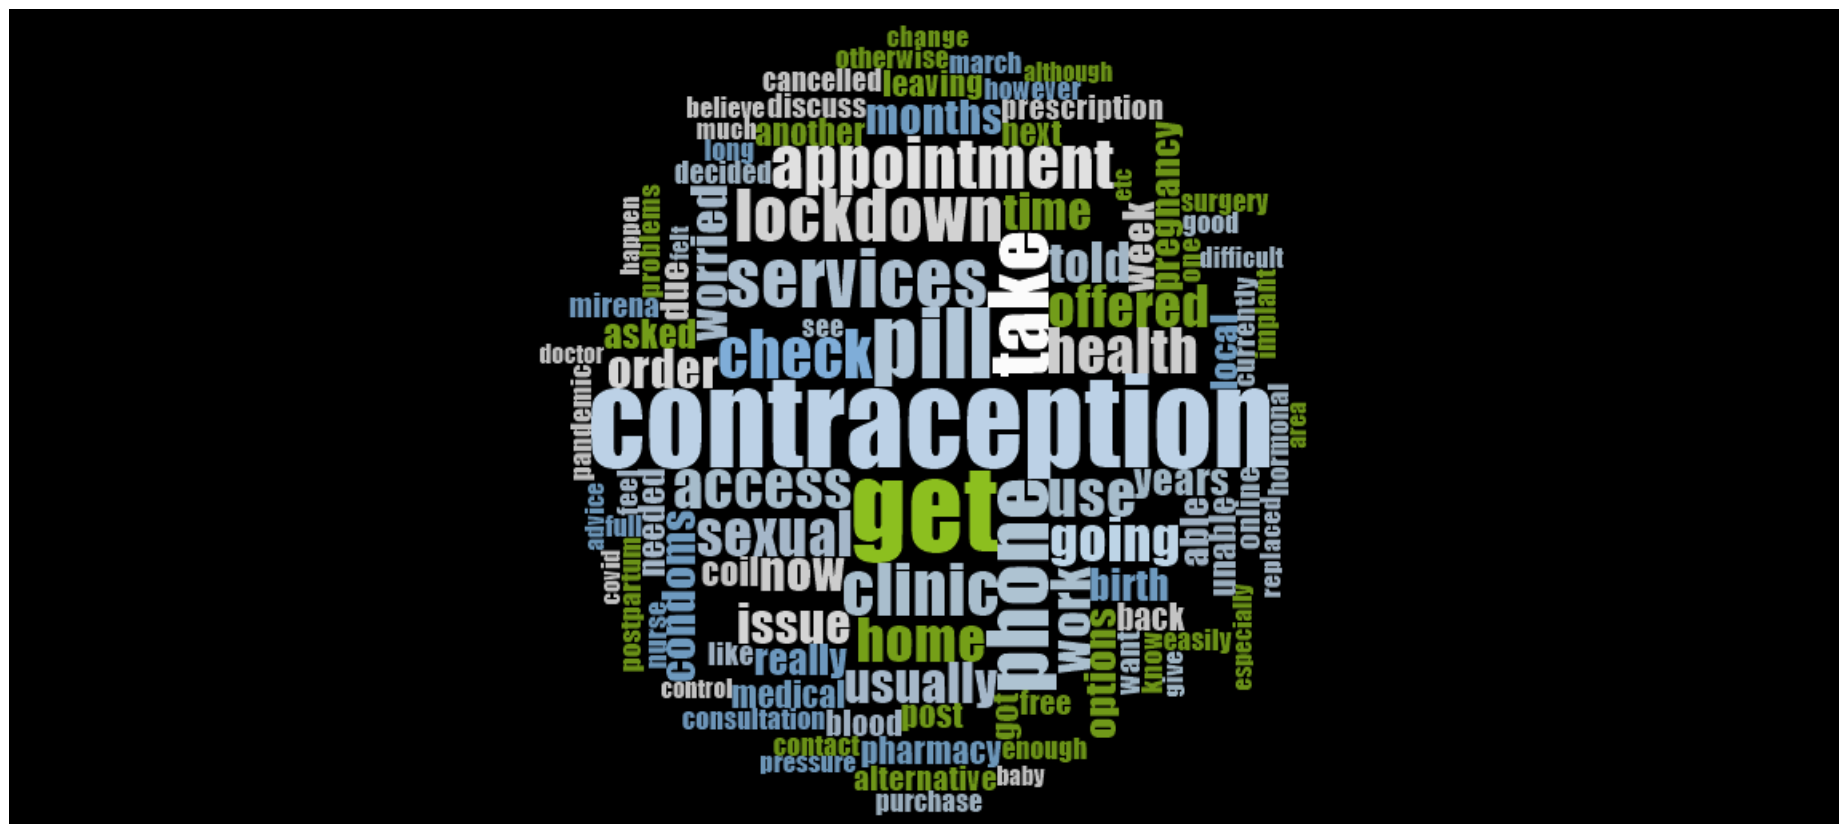

Supplement: Ma_BJGPO.2021.0218_supp.pdf [file Ma_BJGPO.2021.0218_supp.pdf]
